# Supplementary material for: Global optimization of extraframework ensembles in zeolites: structural analysis of extraframework aluminum species in MOR and MFI zeolites
Source: Royal Society of Chemistry journal article supplement (doi:10.1039/d2cp03603g), 2022-01-01
Supplement: d2cp03603g1.pdf [file d2cp03603g1.pdf]

## SUPPORTING INFORMATION

# Global optimization of extraframework ensembles in zeolites: structural analysis of extraframework aluminum species in MOR and MFI zeolites

Elena V. Khramenkova,<sup>a,‡</sup> Harshini Venkatraman,<sup>a,‡</sup> Victor Soethout<sup>a</sup> and Evgeny A. Pidko<sup>a\*</sup>

[a] Inorganic Systems Engineering, Department of Chemical Engineering  
Delft University of Technology  
Van der Maasweg 9, 2629 HZ Delft, The Netherlands

\*: Evgeny A. Pidko, [e.a.pidko@tudelft.nl](mailto:e.a.pidko@tudelft.nl)

## **S1. The topologies of the MOR and ZSM-5 frameworks.**

Different zeolites' topologies have different arrangements and size pores influencing the accessibility of the extraframework species and the proximity of the BAS.<sup>1,2</sup> Therefore, it is important to evaluate the structural features of each topology used in this study. A structure of a MOR has a one-dimensional pore system including the main channel with a diameter of 6.7 x 7.0 Å and a compressed channel with a diameter of 2.6 x 5.7 Å. It was found to be efficient in catalyzing cracking, hydroisomerization, hydrocracking and alkylation.<sup>3</sup> As a one-dimensional zeolite, it might experience diffusion constraints and deactivation by pore blockage. A structure of a ZSM-5 framework has an MFI topology, with intersecting straight and sinusoidal 10-membered ring channels, with a channel of diameter 5.1 x 5.5 Å. This topology is extensively employed in synthesizing hydrocarbons from methanol (MTH), nitrous oxide decomposition and oxidation of benzene to phenol.<sup>4</sup>

## **S2. The choice of the portion of the low-energy structures extracted from GA for the DFT refinement.**

To define the required portion of the GA population pool for finding the low-energy structure, we have performed a test study on the  $[\text{AlOH}]^{2+}$  and  $[\text{AlO}_2\text{H}_3]^{2+}$  stoichiometries, where 9 and 17 structures from the population pool were used respectively. The lowest-lying cluster structures obtained from the GA search were optimized at the PBE-D3(BJ) level of theory to evaluate if the increase in theory level causes changes in energy trends and geometries.<sup>5-8</sup> These cluster DFT calculations were carried out using CP2K software package with the orbital transformation and Quickstep module for faster convergence.<sup>9</sup> The Goedecker-Teter-Hutter pseudopotentials and DZVP-MOLOPT-SR-GTH basis sets were used.<sup>10,11</sup> The changes in the relative electronic

energies when the level of the theory increases are summarized in Figures S1 and S2. For the  $[\text{AlOH}]^{2+}$  stoichiometry, the global minimum observed in the GA search forms  $\text{AlO}^+$  and  $\text{H}^+$  species, which are both bound to different framework Al sites (structure b in Figure S1). The other low-lying structure observed (structure a in Figure S1) has the  $[\text{AlOH}]^{2+}$  site which is bound to a single framework Al embedded in the zeolite. Figure S1 shows that within the 5 lowest-lying configurations found in the GA search, the global minimum can be found which is supported by the DFT-level optimization.

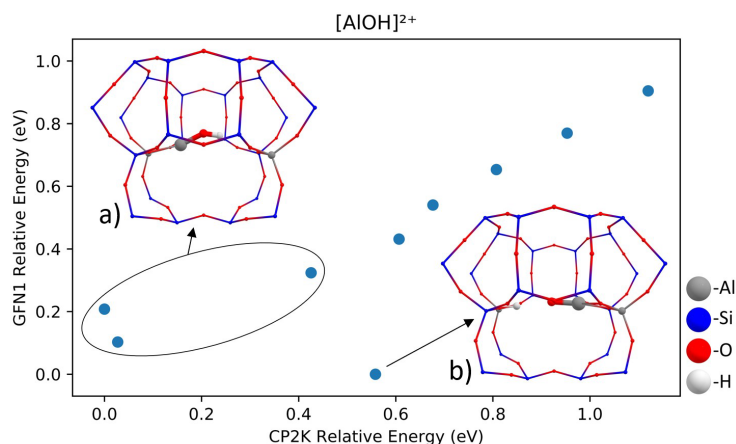

**Figure S1.** The test study assesses the correlation between the electronic energies of the lowest-lying structures obtained from the  $x\text{TB}$ -based GA search and the electronic energies obtained from the following single-point DFT-based calculation. The comparison was conducted on  $[\text{AlOH}]^{2+}$  cluster configurations confined in the side pocket of mordenite. The level of theory employed for the  $x\text{TB}$  is GFN1, while the DFT calculations were carried out at the PBE-D3(BJ) level of theory.

Another stoichiometry –  $[\text{AlO}_2\text{H}_3]^{2+}$  – has shown general agreement between the  $x\text{TB}$  and PBE calculations. The best correlation has been achieved for the formation of the  $[\text{AlO}_2\text{H}_2]^+$  species over one framework Al site and  $\text{H}^+$  over the other (structures c and d in Figure S2). As for the other isomer,  $[\text{AlO}_2\text{H}_3]^{2+}$  site, which is bound to a single framework Al site, higher stability was predicted in the PBE-level optimization. Therefore, based on the inconsistencies between the energies assigned by the  $x\text{TB}$  and DFT methods to the same global minimum defined in the GA

search, we have considered a portion of the low-energy structures from the population pool instead of a single global minimum structure. The choice was made for the 5 lowest structures to capture the electronic deviations caused by the semi-empirical  $xTB$  method at a reasonable computational cost.

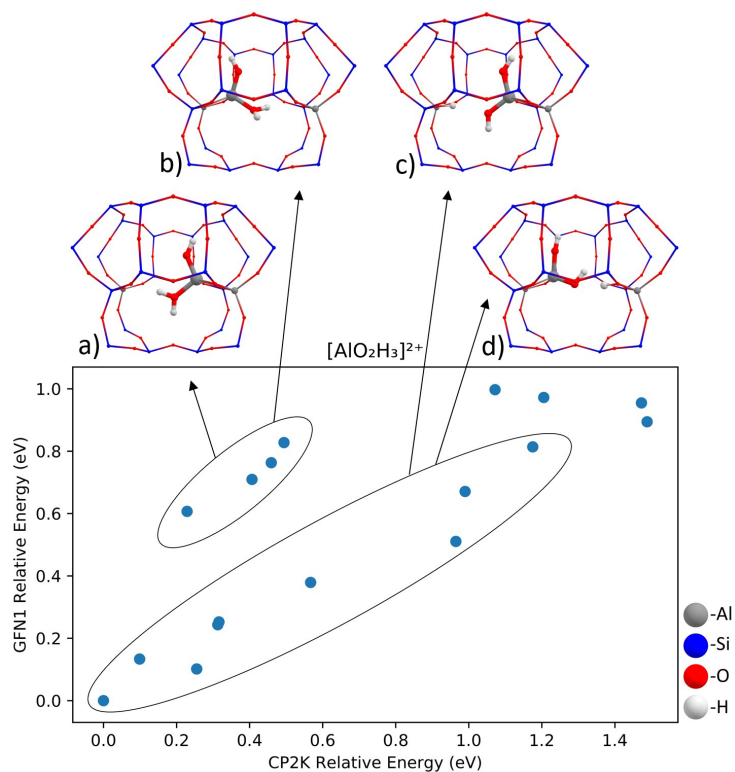

**Figure S2.** The test study assesses the correlation between the electronic energies of the lowest-lying structures obtained from the  $xTB$ -based GA search and the electronic energies obtained from the following single-point DFT-based calculation. The comparison was conducted on  $[AlO_2H_3]^{2+}$  cluster configurations confined in the side pocket of mordenite. The level of theory employed for the  $xTB$  is GFN1, while the DFT calculations were carried out at the PBE-D3(BJ) level of theory.

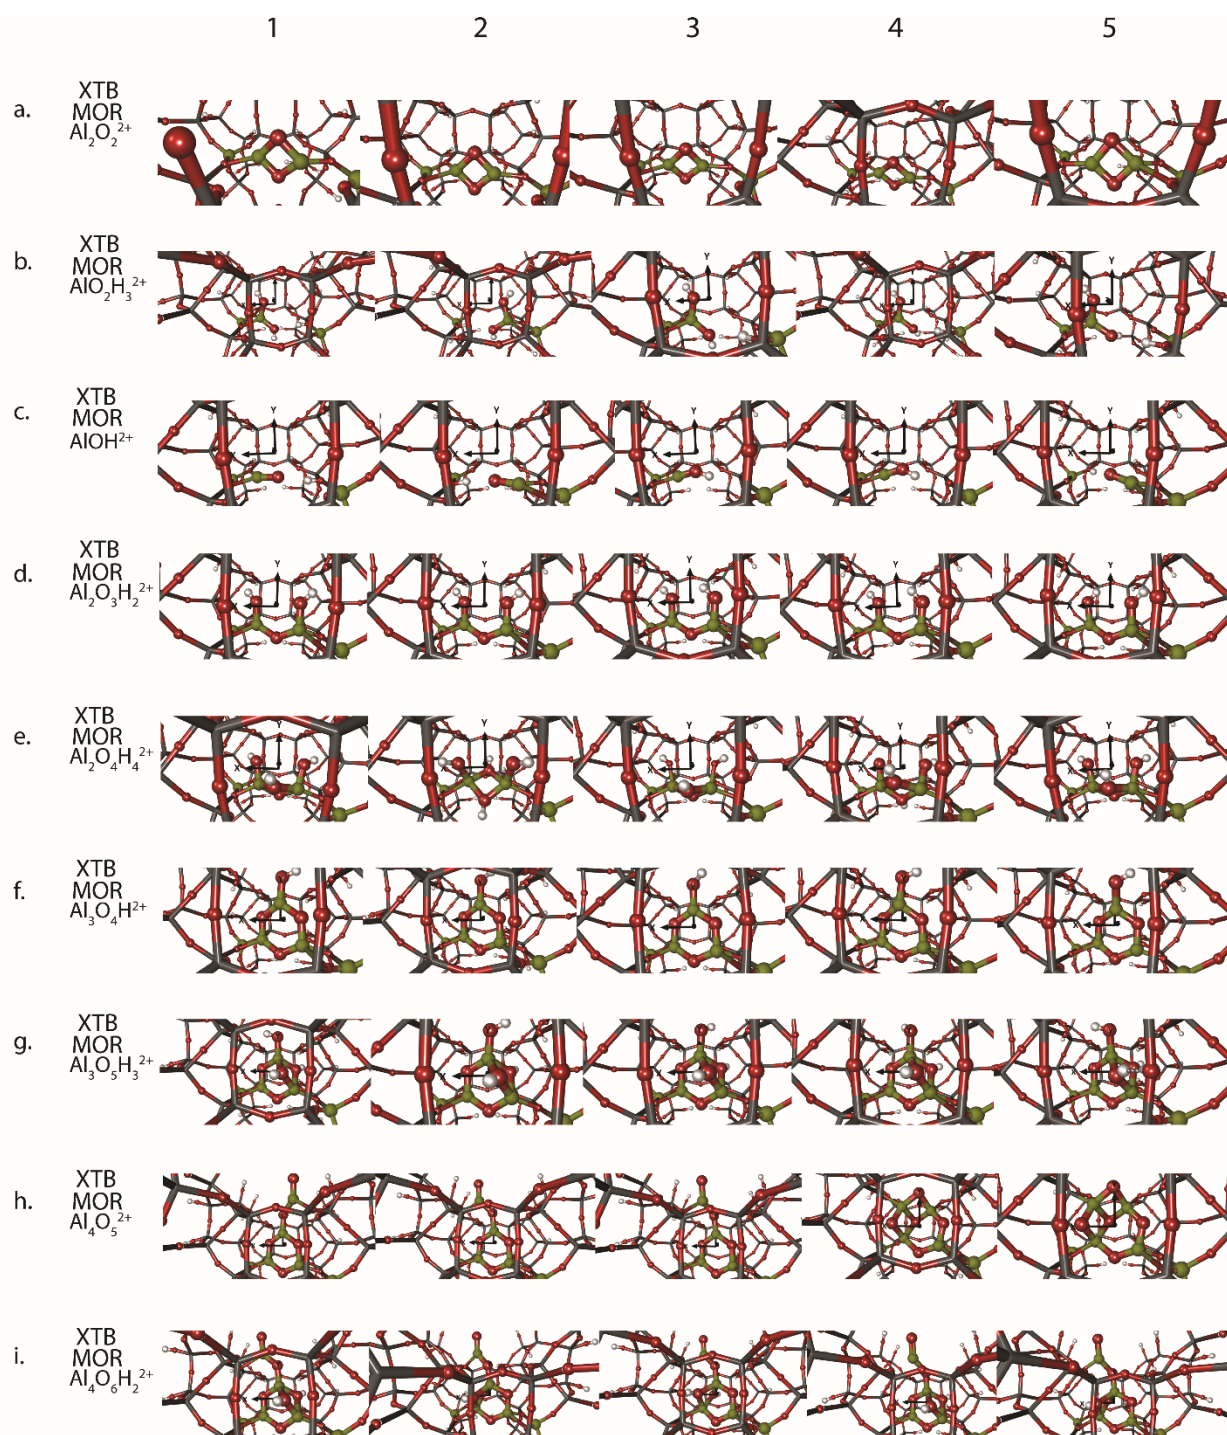

**Figure S3.** The five lowest-lying geometries for each stoichiometry confined in the side pocket of MOR generated in the final population pool of the GA procedure.

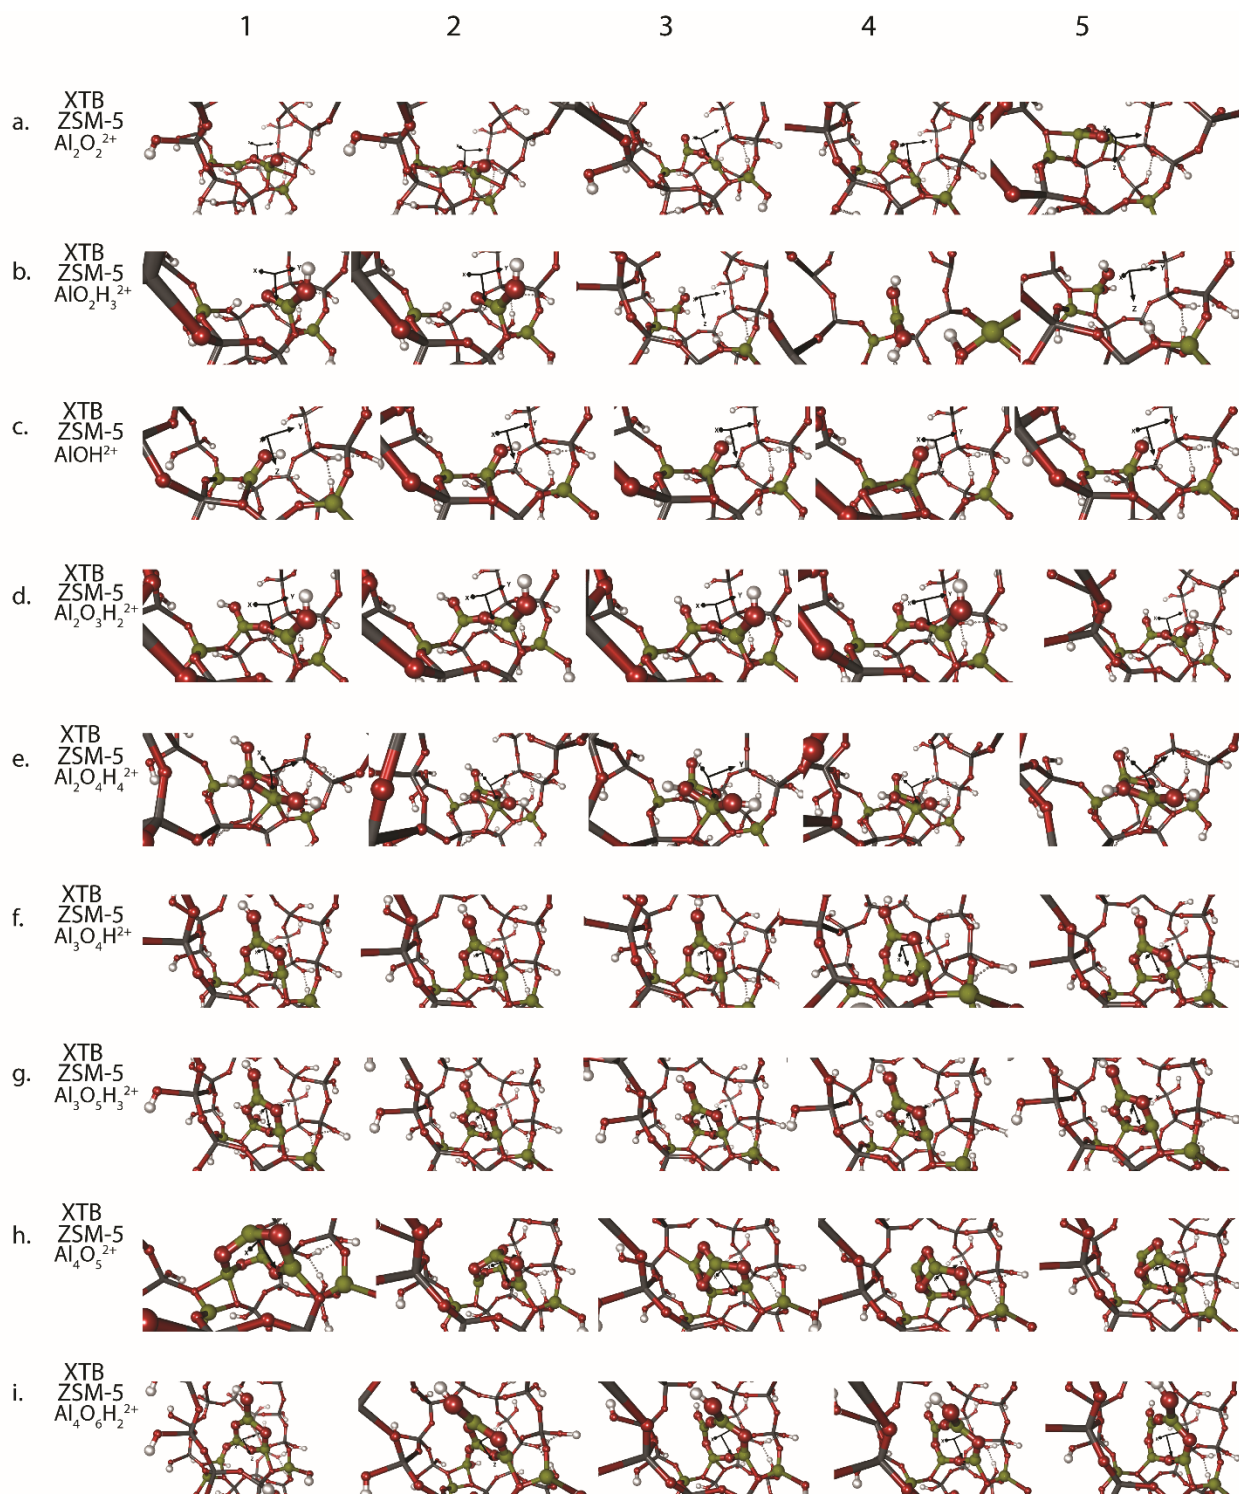

**Figure S4.** The five lowest-lying geometries for each stoichiometry confined in the gamma site of ZSM-5 generated in the final population pool of the GA procedure.



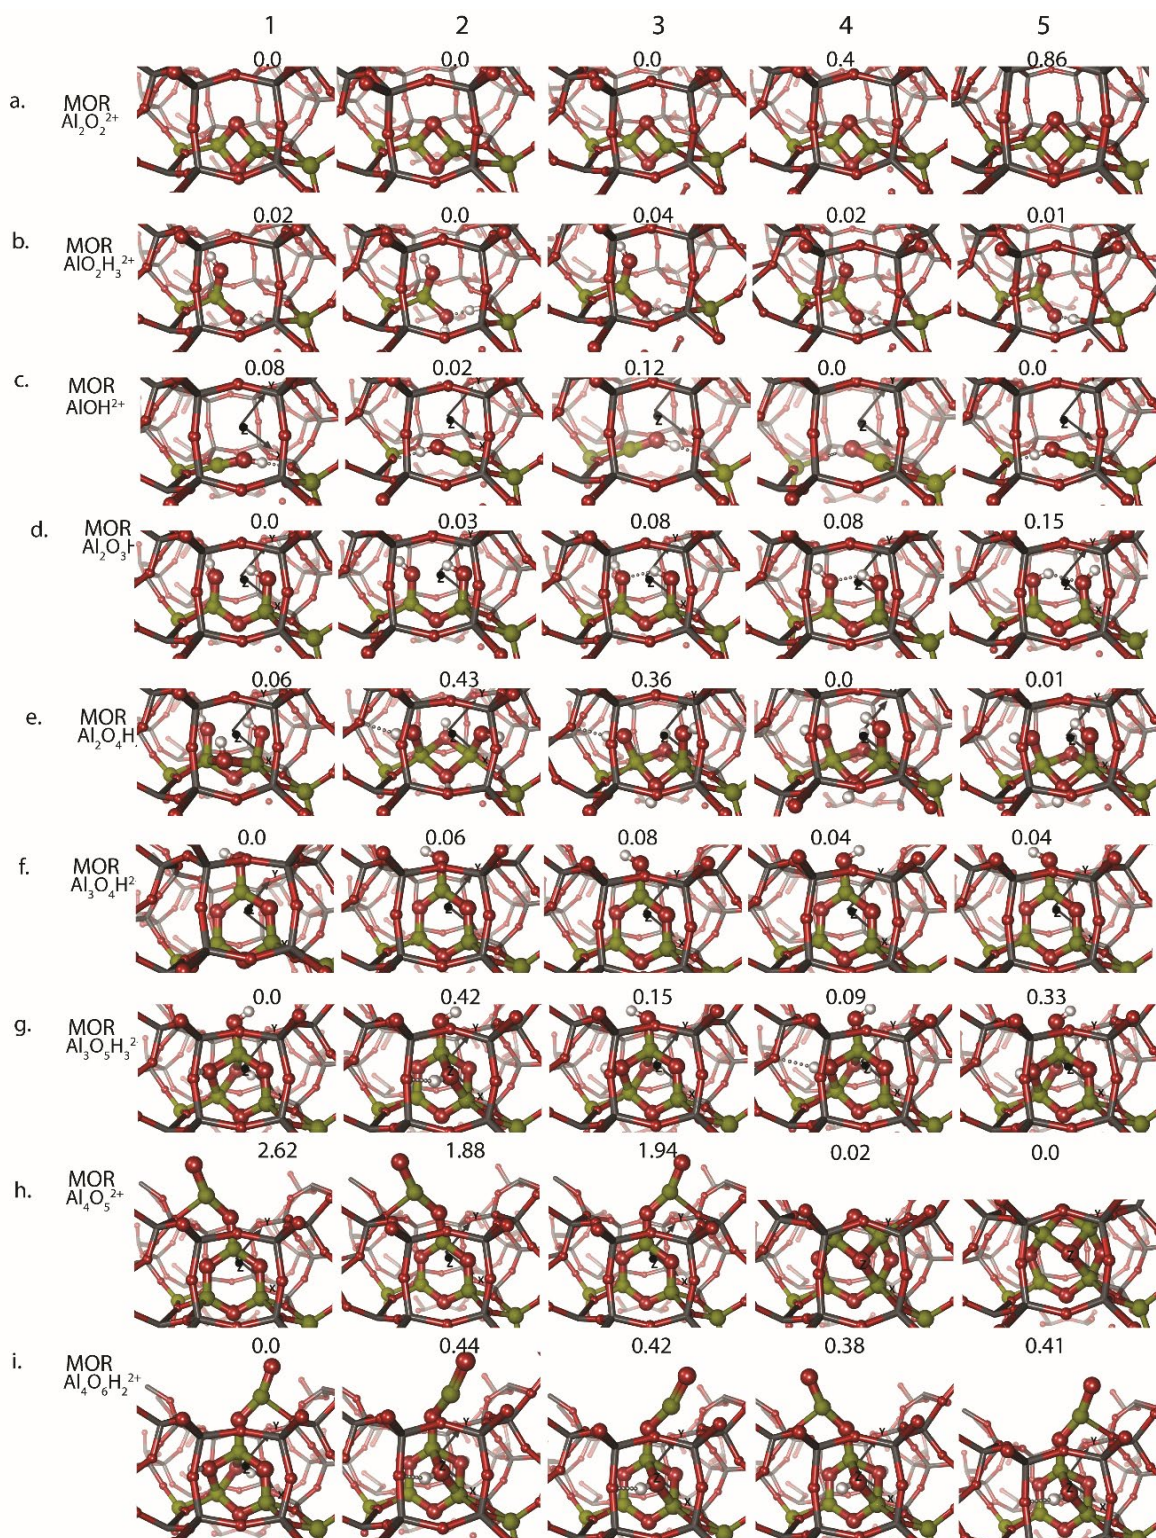

**Figure S5.** The five lowest-lying geometries for each stoichiometry confined in the side pocket of MOR obtained from the GA final population pool and optimized in the periodic cell at the PBE-D3(BJ) level of theory. The energies are on the top of the structures in eV with respect to the lowest-lying configuration in a row.



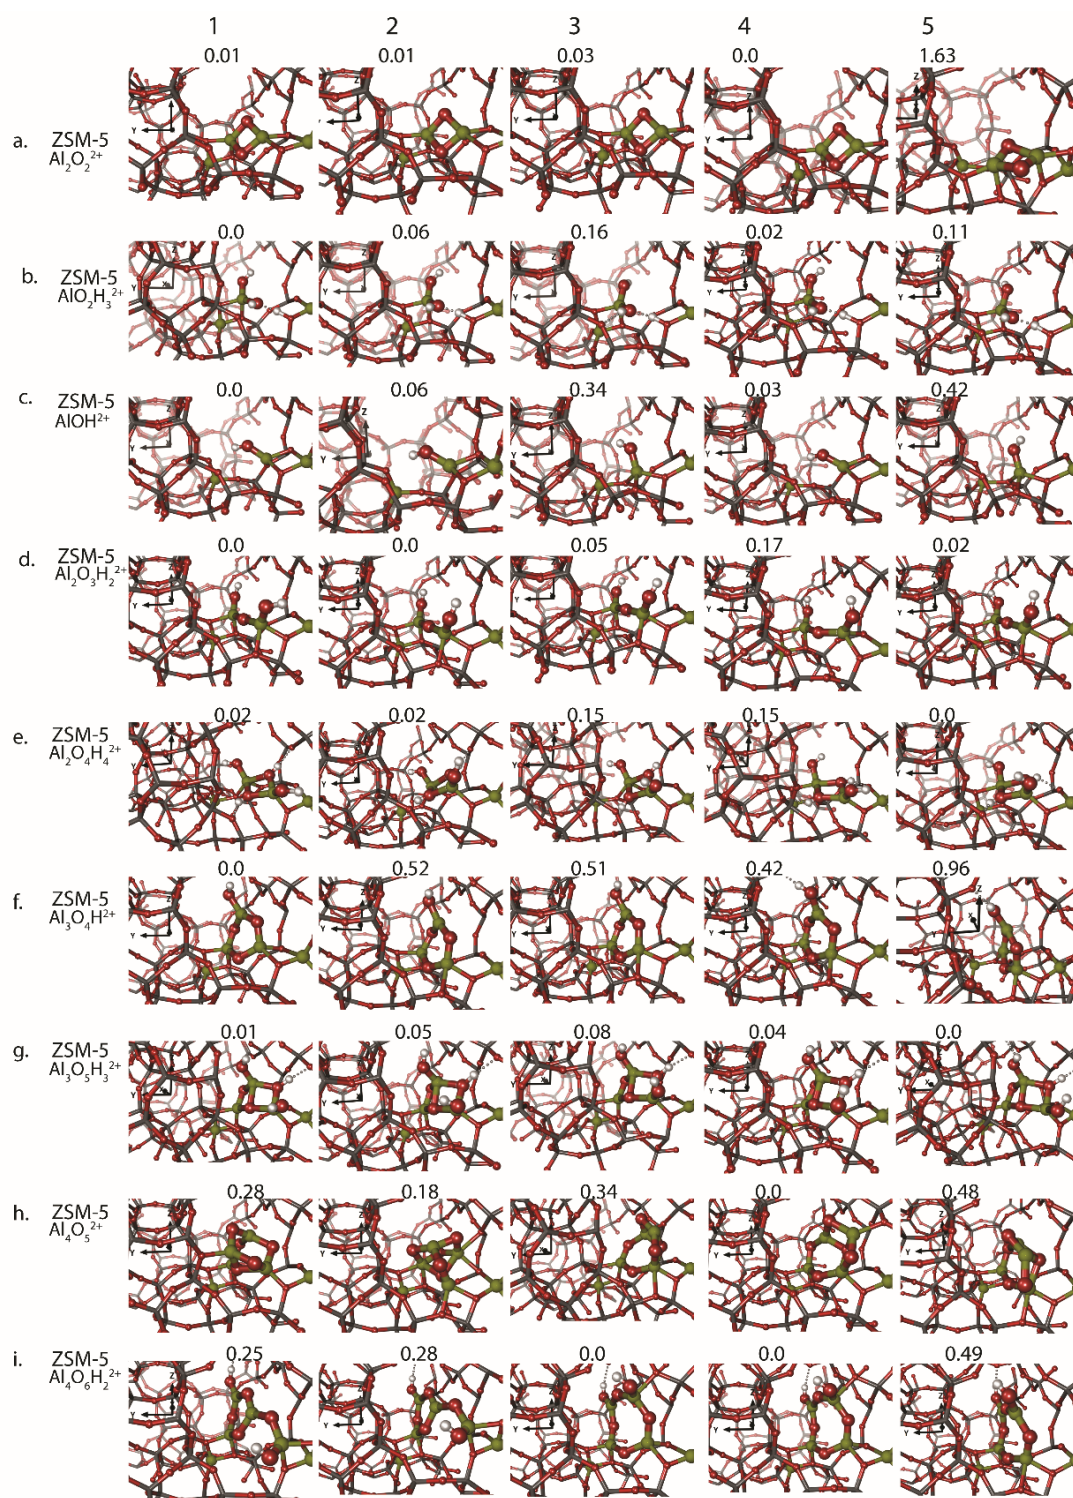

**Figure S6.** The five lowest-lying geometries for each stoichiometry confined in the gamma site of ZSM-5 obtained from the GA final population pool and optimized in the periodic cell at the PBE-D3(BJ) level of theory. The energies are on the top of the structures in eV with respect to the lowest-lying configuration in a row.



### S3. Supplementary aiTD analysis with Al(OH)<sub>3</sub> as a reference system.

The dealumination treatments in zeolites can lead to the formation of abundant EFAl species. To account for an alternative source of EFAl in the system – Al(OH)<sub>3</sub> – another aiTA diagram has been constructed employing Al(OH)<sub>3</sub> as a reference structure. The following equilibrium was considered for the stability assessment:

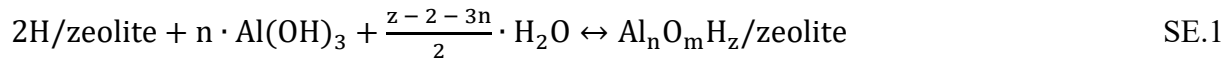

The reaction free energy is defined as:

$$\Delta G_{\text{rxn}}(T, p) = G_{\text{Al}_n\text{O}_m\text{H}_z/\text{zeolite}}^{\text{S}} - n \cdot G_{\text{Al(OH)}_3}^{\text{S}} - G_{2\text{H/zeolite}}^{\text{S}} - \frac{z-2-3n}{2} \cdot \mu_{\text{H}_2\text{O}}^{\text{g}} \quad \text{SE.2}$$

where,  $G_{\text{Al}_n\text{O}_m\text{H}_z/\text{zeolite}}^{\text{S}}$ ,  $G_{\text{Al(OH)}_3}^{\text{S}}$  and  $G_{2\text{H/zeolite}}^{\text{S}}$  are the Gibbs free energies of the EFAl-containing zeolite model, bulk Al(OH)<sub>3</sub> and parent EFAl-free acidic zeolite matrix (2H/zeolite). The bulk, 2H/zeolite and Al<sub>n</sub>O<sub>m</sub>H<sub>z</sub>/zeolite are the DFT-approximated energies of the gibbsite, the respective zeolite framework with two hydrogens and the frameworks with situated EFAls. The PV-contributions entropy of the solids could be neglected and the expression for the Gibbs free energy can be written as:

$$\Delta G_{\text{rxn}}(T, p) = E_{\text{Al}_n\text{O}_m\text{H}_z/\text{zeolite}}^{\text{S}} - n \cdot E_{\text{Al(OH)}_3}^{\text{S}} - E_{2\text{H/zeolite}}^{\text{S}} - \frac{z-2-3n}{2} \cdot \mu_{\text{H}_2\text{O}}^{\text{g}} \quad \text{SE.3}$$

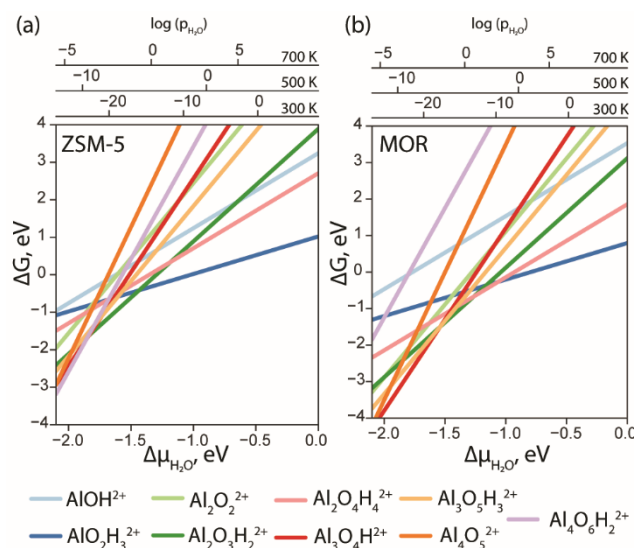

**Figure S7.** The Gibbs free energy diagram of the EFAI species confined in ZSM-5 (a) and in MOR (b) was calculated with respect to the  $\text{Al}(\text{OH})_3$  phase as a function of water chemical potential.

## References

- 1 W. Xu, S. J. Miller, P. K. Agrawal and C. W. Jones, Zeolite topology effects in the alkylation of phenol with propylene, *Appl. Catal. A Gen.*, 2013, **459**, 114–120.
- 2 W. N. P. van der Graaff, C. H. L. Tempelman, E. A. Pidko and E. J. M. Hensen, Influence of pore topology on synthesis and reactivity of Sn-modified zeolite catalysts for carbohydrate conversions, *Catal. Sci. Technol.*, 2017, **7**, 3151–3162.
- 3 J. Aguado, D. P. Serrano, J. M. Escola and A. Peral, Catalytic cracking of polyethylene over zeolite mordenite with enhanced textural properties, *J. Anal. Appl. Pyrolysis*, 2009, **85**, 352–358.
- 4 R. Joyner and M. Stockenhuber, Preparation, Characterization, and Performance of Fe–ZSM-5 Catalysts, *J. Phys. Chem. B*, 1999, **103**, 5963–5976.
- 5 J. P. Perdew, K. Burke and M. Ernzerhof, Generalized gradient approximation made simple, *Phys. Rev. Lett.*, 1996, **77**, 3865–3868.
- 6 S. Grimme, J. Antony, S. Ehrlich and H. Krieg, A consistent and accurate ab initio parametrization of density functional dispersion correction (DFT-D) for the 94 elements H–Pu, *J. Chem. Phys.*, , DOI:10.1063/1.3382344.
- 7 S. Grimme, S. Ehrlich and L. Goerigk, Effect of the damping function in dispersion corrected density functional theory, *J. Comput. Chem.*, 2011, **32**, 1456–1465.
- 8 J. Vandevondele, M. Krack, F. Mohamed, M. Parrinello, T. Chassaing and J. Hutter, Quickstep: Fast and accurate density functional calculations using a mixed Gaussian and plane waves approach, *Comput. Phys. Commun.*, 2005, **167**, 103–128.

- 9 T. D. Kühne, M. Iannuzzi, M. Del Ben, V. V Rybkin, P. Seewald, F. Stein, T. Laino, R. Z. Khaliullin, O. Schütt and F. Schiffmann, CP2K: An electronic structure and molecular dynamics software package-Quickstep: Efficient and accurate electronic structure calculations, *J. Chem. Phys.*, 2020, **152**, 194103.
- 10 J. VandeVondele and J. J. Hutter, Gaussian basis sets for accurate calculations on molecular systems in gas and condensed phases, *J. Chem. Phys.*, 2007, **127**, 114105.
- 11 M. Krack, Pseudopotentials for H to Kr optimized for gradient-corrected exchange-correlation functionals, *Theor. Chem. Acc.*, 2005, **114**, 145–152.
